# Supplementary material
Source: PubMed Central journal article supplement (PMC3963594)
Supplement: supp_tpc.113.120857_tpc120857_SupplementalTable1.pdf [file supp_tpc.113.120857_tpc120857_SupplementalTable1.pdf]

**SUPPLEMENTAL DATA. Leivar and Monte. Plant Cell.**

**Supplemental Table 1. Summary of a selection of PIF-targets that have established or potential regulatory morphogenic functions downstream of the PIFs.**

| AGI                      | Short Name     | PIF-Regulation | PIFq-Bound <sup>l</sup> | Biological/Molecular Function <sup>pq</sup>                                                                     |
|--------------------------|----------------|----------------|-------------------------|-----------------------------------------------------------------------------------------------------------------|
| <b>PIF-induced genes</b> |                |                |                         |                                                                                                                 |
| AT5G39860                | PRE1           | bce            | 4,5                     | (+) Hypocotyl growth in Rc; Inhibits PAR1; BR/GA response <sup>1,2</sup>                                        |
| AT5G15160                | PRE2           | bc             | 4                       | (+) Hypocotyl growth in Rc; Binds PAR1; BR/GA response <sup>1,2</sup>                                           |
| AT4G16780                | ATHB2          | abcde          | 3,4,5                   | (+) Hypocotyl growth in light and diurnal; TF <sup>3,4</sup>                                                    |
| AT2G44910                | ATHB4          | bd             | 1,3,4,5                 | (+) Hypocotyl growth in shade; TF <sup>5</sup>                                                                  |
| AT5G47370                | HAT2           | ce             | 3,4,5                   | (+) Hypocotyl growth in light and shade; TF <sup>5</sup>                                                        |
| AT3G60390                | HAT3           | b              | 3,4                     | (+) Hypocotyl growth in shade; TF <sup>5</sup>                                                                  |
| AT1G18400                | BEE1           | abcde          | 3,4,5                   | (+) Hypocotyl growth in light and shade; TF; BR response <sup>6</sup>                                           |
| AT1G69010                | BIM2           | b              | 1,3,4,5                 | (+) Hypocotyl growth in D, light, shade and diurnal; TF; BR response <sup>6,7</sup>                             |
| AT1G03790                | SOM            | a              | 1,4,5                   | (-) Seed germination downstream of PIF1; TF <sup>8</sup>                                                        |
| AT4G14130                | XTR7/<br>XTH15 | abcd           | 3,4,5                   | (+) Petiole elongation in shade; Cell wall loosening <sup>9</sup>                                               |
| AT1G02340                | HFR1           | abcde          | 1,3,4,5                 | (-) Hypocotyl growth in shade and FRc by inhibiting PIF4/5 <sup>10,11</sup>                                     |
| AT1G14920                | GAI            | b              | 1,3,4,5                 | (-) Hypocotyl growth in light and shade by inhibiting PIF3/4; GA signaling <sup>12-14</sup>                     |
| AT2G42870                | PAR1           | bd             | 1,3,4,5                 | (-) Hypocotyl growth in light and shade by inhibiting PIF4 <sup>2,15</sup>                                      |
| AT2G46970                | PIL1           | defg           | 1,3,4,5,7               | (-) Hypocotyl growth in shade, FRc and Rc; Clock gating of SAS; TF <sup>16,17</sup>                             |
| AT3G62090                | PIL2/<br>PIF6  | abd            | 1,3,4,5                 | (-) Hypocotyl growth in Rc; (+) Seed dormancy; TF <sup>18</sup>                                                 |
| AT2G43060                | IBH1           | ad             | 1,3,4,5                 | (-) Growth; TF; BR response <sup>19</sup>                                                                       |
| AT5G02200                | FHL            | abd            | 1,4,5                   | (-) Hypocotyl growth in FRc; phyA nuclear import; TF <sup>20,21</sup>                                           |
| AT2G37678                | FHY1           | ad             | 4                       | (-) Hypocotyl growth in FRc; phyA nuclear import; TF <sup>20,21</sup>                                           |
| AT1G52830                | IAA6/<br>SHY1  | bcde           | 5                       | (-) Hypocotyl growth in light; (-) Hook formation in D; TF; Auxin signaling <sup>22</sup>                       |
| AT1G04250                | AXR3/<br>IAA17 | ad             | 4                       | (-) Hypocotyl growth in D; (+) SAS; TF; Auxin signaling <sup>23,24</sup>                                        |
| AT1G09570                | PHYA           | b              | 1,4                     | (+) Photomorphogenesis by inducing PIF degradation <sup>25</sup>                                                |
| AT4G28720                | YUC8           | bce            | 3,4,5,7                 | (+) Hypocotyl growth in shade and high temperature; Auxin biosynthesis <sup>26,27</sup>                         |
| AT1G04180                | YUC9           | be             | 3,7                     | (+) Hypocotyl growth in shade; Auxin biosynthesis <sup>26</sup>                                                 |
| AT1G70560                | TAA1           | h              | 1,4,5 <sup>k</sup>      | (+) Hypocotyl growth in high temperature and shade; Auxin biosynthesis <sup>28,29</sup>                         |
| AT4G39950                | CYP79<br>B2    | h              | k                       | (+) Hypocotyl growth; Auxin biosynthesis <sup>28</sup>                                                          |
| AT4G27260                | GH3.5/<br>WES1 | c              | 1,4                     | (-) Hypocotyl growth in Rc, diurnal and EOD-FR; Auxin inactivation <sup>30</sup>                                |
| AT1G70940                | PIN3           | c              | 3,4,5                   | (+) Hook formation in D; (+) Hypocotyl growth in shade; (+) Phototropism in B; Auxin transport <sup>31,32</sup> |
| AT3G14370                | WAG2           | ac             | 3,4                     | (+) Hook maintenance in D and Cotyledon development in light; Auxin transport <sup>33,34</sup>                  |
| AT5G18010                | SAUR-<br>19    | dfh            | 4,5                     | (+) Hypocotyl growth in high temperature; Auxin response <sup>28</sup>                                          |
| AT4G37770                | ACS8           | bcde           | 4 <sup>l</sup>          | (+) Hook formation; Ethylene biosynthesis <sup>35,36</sup>                                                      |
| AT5G65800                | ACS5           | ad             | 4,5                     | (+) Hook formation; (-) Hypocotyl growth in light; Ethylene biosynthesis <sup>35,36</sup>                       |
| AT1G02400                | GA2-<br>OX6    | bd             | 3,4,5                   | (-) Growth; GA inactivation <sup>37</sup>                                                                       |
| AT5G07010                | ST2A           | abcd           | 1,3,4,5                 | JA metabolism <sup>38</sup>                                                                                     |
| AT5G07000                | ST2B           | bce            | 4                       | JA metabolism <sup>38</sup>                                                                                     |

|           |                   |       |                    |                                                                                                                 |
|-----------|-------------------|-------|--------------------|-----------------------------------------------------------------------------------------------------------------|
| AT1G75450 | CKX5              | ab    | 1,3,4,5            | (-) Reproductive meristems; Cytokinin breakdown <sup>39</sup>                                                   |
| AT4G10240 | MIDA-10/<br>BBX23 | ad    | 4                  | (+) Hook maintainance in D; Branching of PIF3 Signaling; TF <sup>40</sup>                                       |
| AT4G32280 | IAA29             | abcde | 3,4,5              | (-) Phototropism in B; TF; Auxin signaling <sup>41</sup>                                                        |
| AT3G15540 | IAA19/<br>MSG2    | abcde | 3,4,5              | (-) Phototropism in B; (-) Hypocotyl gravitropism and hook formation in D; TF; Auxin signaling <sup>41,42</sup> |
| AT5G04190 | PKS4              | c     | 4,5                | (+) Phototropism; (-) phyA and phyB signaling; Binds phototropins and NPH3 <sup>43,44</sup>                     |
| AT4G25470 | CBF2/<br>DREB-1C  | b     | 3,4,5 <sup>m</sup> | Cold acclimation and freezing tolerance; TF <sup>45,46</sup>                                                    |

### PIF-repressed genes

|           |                |     |                |                                                                                          |
|-----------|----------------|-----|----------------|------------------------------------------------------------------------------------------|
| AT1G06040 | STO/<br>BBX24  | a   | 4              | (+) Hypocotyl growth in Rc, FRc and Bc; (+) Salt tolerance; TF <sup>47,48</sup>          |
| AT5G44190 | GLK2           | a   | 4              | (+) Chloroplast development and photosynthetic apparatus; TF <sup>49</sup>               |
| AT4G26150 | GNL/<br>CGA1   | bdi | n              | (-) GA signaling downstream PIFs/DELLA; (+) Chloroplast development; TF <sup>50,51</sup> |
| AT5G56860 | GNC            | i   | 4 <sup>n</sup> | (-) GA signaling downstream PIFs/DELLA; (+) Chloroplast development; TF <sup>50,51</sup> |
| AT5G13630 | GUN5/<br>CHLH  | ad  | o              | Chlorophyll biosynthesis; Photobleaching <sup>52,53</sup>                                |
| AT1G70700 | JAZ9/<br>TIFY7 | c   | 4              | (+) Hypocotyl and petiole growth in light; (-) JA-signaling; TF <sup>54</sup>            |
| AT1G05010 | EFE/<br>ACO    | a   | 4,5            | Ethylene biosynthesis <sup>55</sup>                                                      |
| AT5G67030 | ABA1           | a   | 4              | (+) Long-term skotomorphogenic growth; ABA biosynthesis <sup>56</sup>                    |
| AT1G01060 | LHY            | a   | 4              | Circadian clock; (+) Hypocotyl growth in light; TF <sup>57</sup>                         |
| AT2G46830 | CCA1           | a   | 4              | Circadian clock; (+) Hypocotyl growth in light; TF <sup>57</sup>                         |

### Complex regulation

|           |                 |     |     |                                                                                                          |
|-----------|-----------------|-----|-----|----------------------------------------------------------------------------------------------------------|
| AT5G11260 | HY5             | ad  | 4   | (+) Photomorphogenesis; Antagonistic interaction with PIFs; (+) Anthocyanins in FRc; TF <sup>58,59</sup> |
| AT5G02760 | MIDA9<br>/ PP2C | acd | 4,5 | (+) Hook maintainance in D; Branching of PIF3 Signaling <sup>40</sup>                                    |

### Column heading definitions:

#### PIF-Regulation:

<sup>a</sup> Light-responsive PIFq-dependent by ATH1 arrays (Leivar et al., 2009).

<sup>b</sup> Shade-responsive PIFq-dependent by ATH1 arrays (Leivar et al., 2012).

<sup>c</sup> Growth-responsive PIF4/5-dependent by ATH1 arrays (Nozue et al., 2011).

<sup>d</sup> PIFq-regulated in darkness by RNAseq (Zhang et al., 2013).

<sup>e</sup> Shade-responsive PIF7-dependent by RNAseq (Li et al., 2012).

<sup>f</sup> Not in ATH1 array.

<sup>g</sup> See Figure 2A.

<sup>h</sup> High temperature-induced PIF4-dependent (Franklin et al., 2011).

<sup>i</sup> PIFq-regulated in darkness (Richter et al., 2010).

#### PIFq-Bound:

<sup>j</sup> PIFs that bind to potential regulatory regions by chip-chip (PIF1), chip-seq (PIF3, 4, 5) or chip-qPCR (PIF7) experiments (Oh et al., 2009; Hornitschek et al., 2012; Li et al., 2012; Oh et al., 2012; Zhang et al., 2013).

<sup>k</sup> PIF4-bound by chip-qPCR (Franklin et al., 2011).

<sup>l</sup> PIF5-bound by chip-qPCR (Gallego-Bartolome et al., 2011).

<sup>m</sup> PIF7-bound by chip-qPCR (Lee and Thomashow, 2012).

<sup>n</sup> PIF3-bound by chip-qPCR (Richter et al., 2010).

<sup>o</sup> PIF3-bound by chip-qPCR (Liu et al., 2013).

#### Biological/Molecular Function:

<sup>p</sup> (+) Promotion; (-) Inhibition; TF: Transcription Factor-related function; D: Dark; Rc: Constant red-light; FRc: constant far-red light; Bc: constant blue light; SAS: Shade avoidance syndrome; EOD-FR: End-of-day-far-red.

<sup>q</sup> List of references:

1. (Oh et al., 2012); 2. (Hao et al., 2012); 3. (Steindler et al., 1999); 4. (Kunihiro et al., 2011); 5. (Sorin et al., 2009); 6. (Cifuentes-Esquivel et al., 2013); 7. (Yin et al., 2005); 8. (Kim et al., 2008); 9. (Sasidharan et al., 2010); 10. (Lorrain et al., 2009); 11. (Hornitschek et al., 2009); 12. (Djakovic-Petrovic et al., 2007); 13. (de Lucas et al., 2008); 14. (Feng et al., 2008); 15. (Roig-Villanova et al., 2007); 16. (Roig-Villanova et al., 2006); 17. (Salter et al., 2003); 18. (Penfield et al., 2010); 19. (Bai et al., 2012); 20. (Genoud et al., 2008); 21. (Yang et al., 2009); 22. (Kim et al., 1996); 23. (Leyser et al., 1996); 24. (Sellaro et al., 2012); 25. (Franklin and Quail, 2010); 26. (Li et al., 2012); 27. (Sun et al., 2012); 28. (Franklin et al., 2011); 29. (Tao et al., 2008); 30. (Park et al., 2007); 31. (Zadnikova et al., 2010); 32. (Grebe, 2011); 33. (Willige et al., 2012); 34. (Cheng et al., 2008); 35. (Khanna et al., 2007); 36. (Gallego-Bartolome et al., 2011); 37. (Wang et al., 2004); 38. (Gidda et al., 2003); 39. (Bartrina et al., 2011); 40. (Sentandreu et al., 2011); 41. (Sun et al., 2013); 42. (Tatematsu et al., 2004); 43. (Lariguet et al., 2006); 44. (Schepens et al., 2008); 45. (Kidokoro et al., 2009); 46. (Lee and Thomashow, 2012); 47. (Nagaoka and Takano, 2003); 48. (Yan et al., 2011); 49. (Waters et al., 2009); 50. (Richter et al., 2010); 51. (Chiang et al., 2012); 52. (Liu et al., 2013); 53. (Shin et al., 2009); 54. (Yang et al., 2012); 55. (Iqbal et al., 2013); 56. (Barrero et al., 2008); 57. (Ito et al., 2007); 58. (Chen et al., 2013); 59. (Shin et al., 2007).

#### **SUPPLEMENTAL REFERENCES**

**Bai, M.Y., Fan, M., Oh, E., and Wang, Z.Y.** (2012). A triple helix-loop-helix/basic helix-loop-helix cascade controls cell elongation downstream of multiple hormonal and environmental signaling pathways in Arabidopsis. *Plant Cell* **24**, 4917-4929.

**Barrero, J.M., Rodriguez, P.L., Quesada, V., Alabadi, D., Blazquez, M.A., Boutin, J.P., Marion-Poll, A., Ponce, M.R., and Micol, J.L.** (2008). The ABA1 gene and carotenoid biosynthesis are required for late skotomorphogenic growth in Arabidopsis thaliana. *Plant Cell Environ* **31**, 227-234.

**Bartrina, I., Otto, E., Strnad, M., Werner, T., and Schmulling, T.** (2011). Cytokinin regulates the activity of reproductive meristems, flower organ size, ovule formation, and thus seed yield in Arabidopsis thaliana. *Plant Cell* **23**, 69-80.

**Chen, D., Xu, G., Tang, W., Jing, Y., Ji, Q., Fei, Z., and Lin, R.** (2013). Antagonistic Basic Helix-Loop-Helix/bZIP Transcription Factors Form Transcriptional Modules That Integrate Light and Reactive Oxygen Species Signaling in Arabidopsis. *Plant Cell* **25**, 1657-1673.

- Cheng, Y., Qin, G., Dai, X., and Zhao, Y.** (2008). NPY genes and AGC kinases define two key steps in auxin-mediated organogenesis in Arabidopsis. *Proc Natl Acad Sci U S A* **105**, 21017-21022.
- Chiang, Y.H., Zubo, Y.O., Tapken, W., Kim, H.J., Lavanway, A.M., Howard, L., Pilon, M., Kieber, J.J., and Schaller, G.E.** (2012). Functional characterization of the GATA transcription factors GNC and CGA1 reveals their key role in chloroplast development, growth, and division in Arabidopsis. *Plant Physiol* **160**, 332-348.
- Cifuentes-Esquivel, N., Bou-Torrent, J., Galstyan, A., Gallemi, M., Sessa, G., Salla Martret, M., Roig-Villanova, I., Ruberti, I., and Martinez-Garcia, J.F.** (2013). The bHLH proteins BEE and BIM positively modulate the shade avoidance syndrome in Arabidopsis seedlings. *Plant J* **75**, 989-1002.
- de Lucas, M., Daviere, J.M., Rodriguez-Falcon, M., Pontin, M., Iglesias-Pedraz, J.M., Lorrain, S., Fankhauser, C., Blazquez, M.A., Titarenko, E., and Prat, S.** (2008). A molecular framework for light and gibberellin control of cell elongation. *Nature* **451**, 480-484.
- Djakovic-Petrovic, T., de Wit, M., Voesenek, L.A., and Pierik, R.** (2007). DELLA protein function in growth responses to canopy signals. *Plant J* **51**, 117-126.
- Feng, S., Martinez, C., Gusmaroli, G., Wang, Y., Zhou, J., Wang, F., Chen, L., Yu, L., Iglesias-Pedraz, J.M., Kircher, S., Schafer, E., Fu, X., Fan, L.M., and Deng, X.W.** (2008). Coordinated regulation of Arabidopsis thaliana development by light and gibberellins. *Nature* **451**, 475-479.
- Franklin, K.A., and Quail, P.H.** (2010). Phytochrome functions in Arabidopsis development. *J Exp Bot* **61**, 11-24.
- Franklin, K.A., Lee, S.H., Patel, D., Kumar, S.V., Spartz, A.K., Gu, C., Ye, S., Yu, P., Breen, G., Cohen, J.D., Wigge, P.A., and Gray, W.M.** (2011). Phytochrome-interacting factor 4 (PIF4) regulates auxin biosynthesis at high temperature. *Proc Natl Acad Sci U S A* **108**, 20231-20235.
- Gallego-Bartolome, J., Arana, M.V., Vandenbussche, F., Zadnikova, P., Minguet, E.G., Guardiola, V., Van Der Straeten, D., Benkova, E., Alabadi, D., and Blazquez, M.A.** (2011). Hierarchy of hormone action controlling apical hook development in Arabidopsis. *Plant J* **67**, 622-634.
- Genoud, T., Schweizer, F., Tscheuschler, A., Debrieux, D., Casal, J.J., Schafer, E., Hiltbrunner, A., and Fankhauser, C.** (2008). FHY1 mediates nuclear import of the light-activated phytochrome A photoreceptor. *PLoS Genet* **4**, e1000143.
- Gidda, S.K., Miersch, O., Levitin, A., Schmidt, J., Wasternack, C., and Varin, L.** (2003). Biochemical and molecular characterization of a hydroxyjasmonate sulfotransferase from Arabidopsis thaliana. *J Biol Chem* **278**, 17895-17900.
- Grebe, M.** (2011). Out of the shade and into the light. *Nat Cell Biol* **13**, 347-349.
- Hao, Y., Oh, E., Choi, G., Liang, Z., and Wang, Z.Y.** (2012). Interactions between HLH and bHLH factors modulate light-regulated plant development. *Mol Plant* **5**, 688-697.
- Hornitschek, P., Lorrain, S., Zoete, V., Michielin, O., and Fankhauser, C.** (2009). Inhibition of the shade avoidance response by formation of non-DNA binding bHLH heterodimers. *EMBO J* **28**, 3893-3902.

- Hornitschek, P., Kohnen, M.V., Lorrain, S., Rougemont, J., Ljung, K., Lopez-Vidriero, I., Franco-Zorrilla, J.M., Solano, R., Trevisan, M., Pradervand, S., Xenarios, I., and Fankhauser, C.** (2012). Phytochrome interacting factors 4 and 5 control seedling growth in changing light conditions by directly controlling auxin signaling. *Plant J* **71**, 699-711.
- Iqbal, N., Trivellini, A., Masood, A., Ferrante, A., and Khan, N.A.** (2013). Current understanding on ethylene signaling in plants: The influence of nutrient availability. *Plant Physiol Biochem* **73C**, 128-138.
- Ito, S., Nakamichi, N., Nakamura, Y., Niwa, Y., Kato, T., Murakami, M., Kita, M., Mizoguchi, T., Niinuma, K., Yamashino, T., and Mizuno, T.** (2007). Genetic linkages between circadian clock-associated components and phytochrome-dependent red light signal transduction in *Arabidopsis thaliana*. *Plant Cell Physiol* **48**, 971-983.
- Khanna, R., Shen, Y., Marion, C.M., Tsuchisaka, A., Theologis, A., Schafer, E., and Quail, P.H.** (2007). The basic helix-loop-helix transcription factor PIF5 acts on ethylene biosynthesis and phytochrome signaling by distinct mechanisms. *Plant Cell* **19**, 3915-3929.
- Kidokoro, S., Maruyama, K., Nakashima, K., Imura, Y., Narusaka, Y., Shinwari, Z.K., Osakabe, Y., Fujita, Y., Mizoi, J., Shinozaki, K., and Yamaguchi-Shinozaki, K.** (2009). The phytochrome-interacting factor PIF7 negatively regulates DREB1 expression under circadian control in *Arabidopsis*. *Plant Physiol* **151**, 2046-2057.
- Kim, B.C., Soh, M.C., Kang, B.J., Furuya, M., and Nam, H.G.** (1996). Two dominant photomorphogenic mutations of *Arabidopsis thaliana* identified as suppressor mutations of *hy2*. *Plant J* **9**, 441-456.
- Kim, D.H., Yamaguchi, S., Lim, S., Oh, E., Park, J., Hanada, A., Kamiya, Y., and Choi, G.** (2008). SOMNUS, a CCCH-type zinc finger protein in *Arabidopsis*, negatively regulates light-dependent seed germination downstream of PIL5. *Plant Cell* **20**, 1260-1277.
- Kunihiro, A., Yamashino, T., Nakamichi, N., Niwa, Y., Nakanishi, H., and Mizuno, T.** (2011). Phytochrome-interacting factor 4 and 5 (PIF4 and PIF5) activate the homeobox *ATHB2* and auxin-inducible *IAA29* genes in the coincidence mechanism underlying photoperiodic control of plant growth of *Arabidopsis thaliana*. *Plant Cell Physiol* **52**, 1315-1329.
- Lariguet, P., Schepens, I., Hodgson, D., Pedmale, U.V., Trevisan, M., Kami, C., de Carbonnel, M., Alonso, J.M., Ecker, J.R., Liscum, E., and Fankhauser, C.** (2006). PHYTOCHROME KINASE SUBSTRATE 1 is a phototropin 1 binding protein required for phototropism. *Proc Natl Acad Sci U S A* **103**, 10134-10139.
- Lee, C.M., and Thomashow, M.F.** (2012). Photoperiodic regulation of the C-repeat binding factor (CBF) cold acclimation pathway and freezing tolerance in *Arabidopsis thaliana*. *Proc Natl Acad Sci U S A* **109**, 15054-15059.
- Leivar, P., Tepperman, J.M., Monte, E., Calderon, R.H., Liu, T.L., and Quail, P.H.** (2009). Definition of early transcriptional circuitry involved in light-induced reversal of PIF-imposed repression of photomorphogenesis in young *Arabidopsis* seedlings. *Plant Cell* **21**, 3535-3553.

- Leivar, P., Tepperman, J.M., Cohn, M.M., Monte, E., Al-Sady, B., Erickson, E., and Quail, P.H.** (2012). Dynamic antagonism between phytochromes and PIF family basic helix-loop-helix factors induces selective reciprocal responses to light and shade in a rapidly responsive transcriptional network in Arabidopsis. *Plant Cell* **24**, 1398-1419.
- Leyser, H.M., Pickett, F.B., Dharmasiri, S., and Estelle, M.** (1996). Mutations in the AXR3 gene of Arabidopsis result in altered auxin response including ectopic expression from the SAUR-AC1 promoter. *Plant J* **10**, 403-413.
- Li, L., Ljung, K., Breton, G., Schmitz, R.J., Pruneda-Paz, J., Cowing-Zitron, C., Cole, B.J., Ivans, L.J., Pedmale, U.V., Jung, H.S., Ecker, J.R., Kay, S.A., and Chory, J.** (2012). Linking photoreceptor excitation to changes in plant architecture. *Genes Dev* **26**, 785-790.
- Liu, X., Chen, C.Y., Wang, K.C., Luo, M., Tai, R., Yuan, L., Zhao, M., Yang, S., Tian, G., Cui, Y., Hsieh, H.L., and Wu, K.** (2013). PHYTOCHROME INTERACTING FACTOR3 associates with the histone deacetylase HDA15 in repression of chlorophyll biosynthesis and photosynthesis in etiolated Arabidopsis seedlings. *Plant Cell* **25**, 1258-1273.
- Lorrain, S., Trevisan, M., Pradervand, S., and Fankhauser, C.** (2009). Phytochrome interacting factors 4 and 5 redundantly limit seedling de-etiolation in continuous far-red light. *Plant J* **60**, 449-461.
- Nagaoka, S., and Takano, T.** (2003). Salt tolerance-related protein STO binds to a Myb transcription factor homologue and confers salt tolerance in Arabidopsis. *J Exp Bot* **54**, 2231-2237.
- Nozue, K., Harmer, S.L., and Maloof, J.N.** (2011). Genomic analysis of circadian clock-, light-, and growth-correlated genes reveals PHYTOCHROME-INTERACTING FACTOR5 as a modulator of auxin signaling in Arabidopsis. *Plant Physiol* **156**, 357-372.
- Oh, E., Zhu, J.Y., and Wang, Z.Y.** (2012). Interaction between BZR1 and PIF4 integrates brassinosteroid and environmental responses. *Nat Cell Biol* **14**, 802-809.
- Oh, E., Kang, H., Yamaguchi, S., Park, J., Lee, D., Kamiya, Y., and Choi, G.** (2009). Genome-wide analysis of genes targeted by PHYTOCHROME INTERACTING FACTOR 3-LIKE5 during seed germination in Arabidopsis. *Plant Cell* **21**, 403-419.
- Park, J.E., Seo, P.J., Lee, A.K., Jung, J.H., Kim, Y.S., and Park, C.M.** (2007). An Arabidopsis GH3 gene, encoding an auxin-conjugating enzyme, mediates phytochrome B-regulated light signals in hypocotyl growth. *Plant Cell Physiol* **48**, 1236-1241.
- Penfield, S., Josse, E.M., and Halliday, K.J.** (2010). A role for an alternative splice variant of PIF6 in the control of Arabidopsis primary seed dormancy. *Plant Mol Biol* **73**, 89-95.
- Richter, R., Behringer, C., Muller, I.K., and Schwechheimer, C.** (2010). The GATA-type transcription factors GNC and GNL/CGA1 repress gibberellin signaling downstream from DELLA proteins and PHYTOCHROME-INTERACTING FACTORS. *Genes Dev* **24**, 2093-2104.

- Roig-Villanova, I., Bou, J., Sorin, C., Devlin, P.F., and Martinez-Garcia, J.F.** (2006). Identification of primary target genes of phytochrome signaling. Early transcriptional control during shade avoidance responses in Arabidopsis. *Plant Physiol* **141**, 85-96.
- Roig-Villanova, I., Bou-Torrent, J., Galstyan, A., Carretero-Paulet, L., Portoles, S., Rodriguez-Concepcion, M., and Martinez-Garcia, J.F.** (2007). Interaction of shade avoidance and auxin responses: a role for two novel atypical bHLH proteins. *EMBO J* **26**, 4756-4767.
- Salter, M.G., Franklin, K.A., and Whitelam, G.C.** (2003). Gating of the rapid shade-avoidance response by the circadian clock in plants. *Nature* **426**, 680-683.
- Sasidharan, R., Chinnappa, C.C., Staal, M., Elzenga, J.T., Yokoyama, R., Nishitani, K., Voesenek, L.A., and Pierik, R.** (2010). Light quality-mediated petiole elongation in Arabidopsis during shade avoidance involves cell wall modification by xyloglucan endotransglucosylase/hydrolases. *Plant Physiol* **154**, 978-990.
- Schepens, I., Boccalandro, H.E., Kami, C., Casal, J.J., and Fankhauser, C.** (2008). PHYTOCHROME KINASE SUBSTRATE4 modulates phytochrome-mediated control of hypocotyl growth orientation. *Plant Physiol* **147**, 661-671.
- Sellaro, R., Pacin, M., and Casal, J.J.** (2012). Diurnal dependence of growth responses to shade in Arabidopsis: role of hormone, clock, and light signaling. *Mol Plant* **5**, 619-628.
- Sentandreu, M., Martin, G., Gonzalez-Schain, N., Leivar, P., Soy, J., Tepperman, J.M., Quail, P.H., and Monte, E.** (2011). Functional profiling identifies genes involved in organ-specific branches of the PIF3 regulatory network in Arabidopsis. *Plant Cell* **23**, 3974-3991.
- Shin, J., Park, E., and Choi, G.** (2007). PIF3 regulates anthocyanin biosynthesis in an HY5-dependent manner with both factors directly binding anthocyanin biosynthetic gene promoters in Arabidopsis. *Plant J* **49**, 981-994.
- Shin, J., Kim, K., Kang, H., Zulfugarov, I.S., Bae, G., Lee, C.H., Lee, D., and Choi, G.** (2009). Phytochromes promote seedling light responses by inhibiting four negatively-acting phytochrome-interacting factors. *Proc Natl Acad Sci U S A* **106**, 7660-7665.
- Sorin, C., Salla-Martret, M., Bou-Torrent, J., Roig-Villanova, I., and Martinez-Garcia, J.F.** (2009). ATHB4, a regulator of shade avoidance, modulates hormone response in Arabidopsis seedlings. *Plant J* **59**, 266-277.
- Steindler, C., Matteucci, A., Sessa, G., Weimar, T., Ohgishi, M., Aoyama, T., Morelli, G., and Ruberti, I.** (1999). Shade avoidance responses are mediated by the ATHB-2 HD-zip protein, a negative regulator of gene expression. *Development* **126**, 4235-4245.
- Sun, J., Qi, L., Li, Y., Chu, J., and Li, C.** (2012). PIF4-mediated activation of YUCCA8 expression integrates temperature into the auxin pathway in regulating arabidopsis hypocotyl growth. *PLoS Genet* **8**, e1002594.
- Sun, J., Qi, L., Li, Y., Zhai, Q., and Li, C.** (2013). PIF4 and PIF5 Transcription Factors Link Blue Light and Auxin to Regulate the Phototropic Response in Arabidopsis. *Plant Cell* **25**, 2102-2114.
- Tao, Y., Ferrer, J.L., Ljung, K., Pojer, F., Hong, F., Long, J.A., Li, L., Moreno, J.E., Bowman, M.E., Ivans, L.J., Cheng, Y., Lim, J., Zhao, Y., Ballare, C.L.,**

- Sandberg, G., Noel, J.P., and Chory, J.** (2008). Rapid synthesis of auxin via a new tryptophan-dependent pathway is required for shade avoidance in plants. *Cell* **133**, 164-176.
- Tatematsu, K., Kumagai, S., Muto, H., Sato, A., Watahiki, M.K., Harper, R.M., Liscum, E., and Yamamoto, K.T.** (2004). MASSUGU2 encodes Aux/IAA19, an auxin-regulated protein that functions together with the transcriptional activator NPH4/ARF7 to regulate differential growth responses of hypocotyl and formation of lateral roots in *Arabidopsis thaliana*. *Plant Cell* **16**, 379-393.
- Wang, H., Caruso, L.V., Downie, A.B., and Perry, S.E.** (2004). The embryo MADS domain protein AGAMOUS-Like 15 directly regulates expression of a gene encoding an enzyme involved in gibberellin metabolism. *Plant Cell* **16**, 1206-1219.
- Waters, M.T., Wang, P., Korkaric, M., Capper, R.G., Saunders, N.J., and Langdale, J.A.** (2009). GLK transcription factors coordinate expression of the photosynthetic apparatus in *Arabidopsis*. *Plant Cell* **21**, 1109-1128.
- Willige, B.C., Ogiso-Tanaka, E., Zourelidou, M., and Schwechheimer, C.** (2012). WAG2 represses apical hook opening downstream from gibberellin and PHYTOCHROME INTERACTING FACTOR 5. *Development* **139**, 4020-4028.
- Yan, H., Marquardt, K., Indorf, M., Jutt, D., Kircher, S., Neuhaus, G., and Rodriguez-Franco, M.** (2011). Nuclear localization and interaction with COP1 are required for STO/BBX24 function during photomorphogenesis. *Plant Physiol* **156**, 1772-1782.
- Yang, D.L., Yao, J., Mei, C.S., Tong, X.H., Zeng, L.J., Li, Q., Xiao, L.T., Sun, T.P., Li, J., Deng, X.W., Lee, C.M., Thomashow, M.F., Yang, Y., He, Z., and He, S.Y.** (2012). Plant hormone jasmonate prioritizes defense over growth by interfering with gibberellin signaling cascade. *Proc Natl Acad Sci U S A* **109**, E1192-1200.
- Yang, S.W., Jang, I.C., Henriques, R., and Chua, N.H.** (2009). FAR-RED ELONGATED HYPOCOTYL1 and FHY1-LIKE associate with the *Arabidopsis* transcription factors LAF1 and HFR1 to transmit phytochrome A signals for inhibition of hypocotyl elongation. *Plant Cell* **21**, 1341-1359.
- Yin, Y., Vafeados, D., Tao, Y., Yoshida, S., Asami, T., and Chory, J.** (2005). A new class of transcription factors mediates brassinosteroid-regulated gene expression in *Arabidopsis*. *Cell* **120**, 249-259.
- Zadnikova, P., Petrasek, J., Marhavy, P., Raz, V., Vandenbussche, F., Ding, Z., Schwarzerova, K., Morita, M.T., Tasaka, M., Hejatko, J., Van Der Straeten, D., Friml, J., and Benkova, E.** (2010). Role of PIN-mediated auxin efflux in apical hook development of *Arabidopsis thaliana*. *Development* **137**, 607-617.
- Zhang, Y., Mayba, O., Pfeiffer, A., Shi, H., Tepperman, J.M., Speed, T.P., and Quail, P.H.** (2013). A quartet of PIF bHLH factors provides a transcriptionally centered signaling hub that regulates seedling morphogenesis through differential expression-patterning of shared target genes in *Arabidopsis*. *PLoS Genet* **9**, e1003244.
